# Supplementary material
Source: PubMed Central journal article supplement (PMC3676118)
Supplement: JVI.03479-12_zjv999097744so1.pdf [file JVI.03479-12_zjv999097744so1.pdf]

| position in the CDV H protein  | 503                                   | 541                 | 560 |
|--------------------------------|---------------------------------------|---------------------|-----|
| CDV CYN07-dV                   | DVLTESNLVVLPTQNFYVIATYDISRGDHAIVVYVYD | PFRTISYTPFRLTTKGRPD |     |
| CDV CYN07-hV                   |                                       | S                   |     |
| CDV monkey-BJ-01_FJ405223      |                                       | N                   |     |
| CDV monkey-KM-01_FJ405224      |                                       | I                   |     |
| CDV NM_EF445053                |                                       | I                   |     |
| CDV MAS5_AB286951              |                                       | I                   |     |
| CDV Hamamatsu_D85754           |                                       | G                   |     |
| CDV Yanaka_D85755              |                                       | G                   | M   |
| CDV HM-3_AB040767              | V                                     | EN                  |     |
| CDV 98Marten_EU716074          | V                                     | N                   | M   |
| CDV HLJ1_EU743934              | F                                     | V                   | RY  |
| CDV Onderstepoort_AF378705     | I                                     | I                   | S   |
| CDV BV3_FJ416338               | I                                     | I                   | S   |
| CDV A75/17_AF164967            |                                       |                     |     |
| CDV 01-2676_AY498692           |                                       | R                   | V   |
| CDV 00-2601_AY438597           | I                                     | I                   |     |
| CDV DK91A_AF478544             |                                       |                     | H   |
| CDV Danish_Z47761              |                                       |                     | H   |
| CDV A92-6_Z54166               |                                       |                     | H   |
| CDV 1493/Han89_X84999          | I                                     |                     | D   |
| CDV Danish_Z47759              |                                       | N                   | D   |
| CDV 207/00_DQ228166            |                                       |                     | N   |
| CDV PDV-2_X84998               |                                       |                     | N   |
| CDV Liud_AF172411              |                                       |                     | N   |
| CDV 4spSouthAfrica_FJ461715    |                                       | V                   | N   |
| MV Edmonston_A_U03669          | KLS                                   | I                   | G   |
| MV Younde.CAE_B1_AF079552      | KLS                                   | I                   | G   |
| MV Libreville.GAB_B2_AF079551  | KLS                                   | I                   | G   |
| MV Ibadan.NIE/97/1_B3_AJ23913  | KLS                                   | I                   | G   |
| MV Tokyo.JPN/84_C1_AY047365    | KLS                                   | I                   | G   |
| MV JM 1977_C2_M81898           | KLS                                   | I                   | G   |
| MV WTFB_C2_Z80808              | KLS                                   | I                   | G   |
| MV MVP_D1_Z80805               | KLS                                   | I                   | G   |
| MV Chicago1_D3_M81895          | KLS                                   | I                   | G   |
| MV Montreal.CAN_D4_AAC29442    | KLS                                   | I                   | G   |
| MV PAL-93H_D5_AAA74532         | KLS                                   | I                   | G   |
| MV Thailand-94_D5_AAB63777     | KLS                                   | I                   | G   |
| MV NJ 1994_D6_AAA74529         | KLS                                   | I                   | G   |
| MV Vic.AU/16.85_D7_AAG15478    | KLS                                   | I                   | G   |
| MV Illinois.USA_D7_AAK95355    | KLS                                   | I                   | G   |
| MV UK140H94_D8_AAC35876        | KLS                                   | I                   | G   |
| MV Vic.AU/12.99_D9_AAM96002    | KLS                                   | I                   | G   |
| MV Kampala.UGA_D10_AAX52047    | KLS                                   | I                   | G   |
| MV Menglian Yunnan_D11_ADI4432 | KLS                                   | I                   | G   |
| MV Berkley.USA/2.83_G1         | KLS                                   | I                   | G   |
| MV Amsterdam.NET_G2_AAF28390   | KLS                                   | I                   | G   |
| MV Gresik.INO/18.02_G3_AAO2777 | KLS                                   | I                   | G   |
| MV China93-7_H1_AAC03033       | KLS                                   | I                   | G   |
| MV China94-1_H2_AAC03035       | KLS                                   | I                   | G   |
| position in the MV H protein   | 507                                   | 545                 | 564 |

**Supplementary Figure 1. Amino acid sequence alignment of the H proteins of various CDV and MV strains.** The amino acid sequences at positions 503–560 of the CDV H proteins and positions 507–564 of the MV H proteins are aligned. Dots indicate the identical amino acid residues to those of the CDV CYN07-dV H protein. The box indicates the amino acid at position 541 of the CDV H protein and position 545 of the MV H protein. The DDBJ/GenBank accession numbers are provided with the CDV and MV strain names.
